# Supplementary material for: Effect of non-resonant background on the extraction of Raman signals from CARS spectra using deep neural networks
Source: Royal Society of Chemistry journal article supplement (doi:10.1039/d2ra03983d), 2022-01-01
Supplement: d2ra03983d1.pdf [file d2ra03983d1.pdf]

Supplementary material

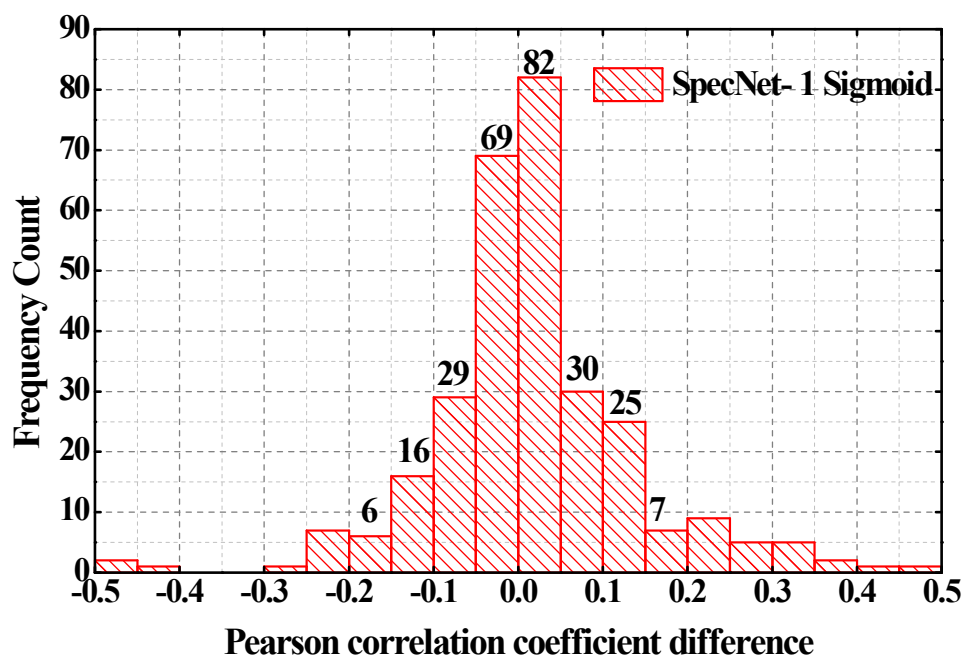

Fig. 1 Histogram plot of the PCC difference obtained from the SpecNet and 1 Sigmoid model.

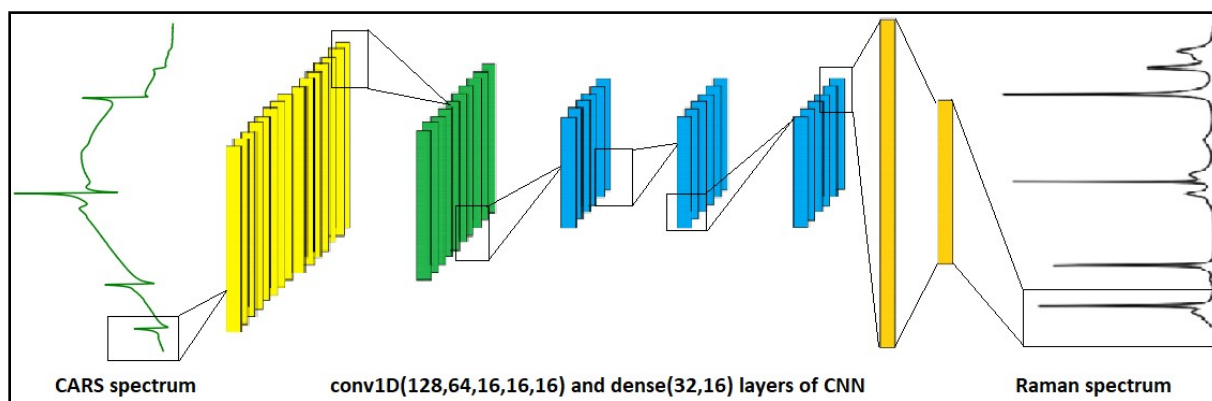

Fig. 2 Typical schematic of the CNN model architecture.

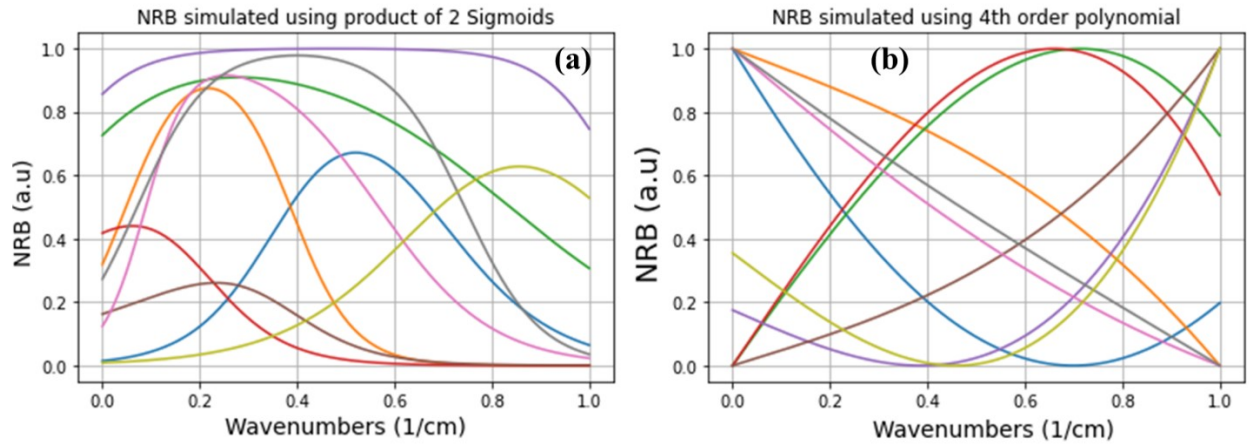

**Fig. 3** Various NRB shapes simulated using a) Product of two Sigmoid and b) 4<sup>th</sup> order polynomial function.
